# Supplementary material for: Dose Intervals and Time since Final Dose on Changes in Metabolic Indices after COVID-19 Vaccination
Source: MDPI journal article supplement (doi:10.3390/vaccines11121746), 2023-11-23
Supplement: s1 [file s1]

**Table S1:** Mean and Median differences (post-vaccination – pre-vaccination) among groups based on the first-to-second-dose dose interval and time since the final dose along with p-values.

|                          | Changes in 1 <sup>st</sup> to 2 <sup>nd</sup> dose interval |          |           |          | Changes in the time since the final dose |          |            |          |
|--------------------------|-------------------------------------------------------------|----------|-----------|----------|------------------------------------------|----------|------------|----------|
|                          | ≤ 8 Weeks                                                   | <i>p</i> | > 8 Weeks | <i>p</i> | ≤ 6 months                               | <i>p</i> | > 6 months | <i>p</i> |
| <b>Adolescents</b>       |                                                             |          |           |          |                                          |          |            |          |
| Weight (Kg)              | 11.5                                                        | <0.001   | 6.99      | 0.004    | 9.1                                      | 0.006    | 10.67      | <0.001   |
| BMI (Kg/m <sup>2</sup> ) | 4.83                                                        | <0.001   | 3.15      | 0.002    | 3.78                                     | 0.007    | 4.57       | <0.001   |
| Waist (cm)               | 6.24                                                        | <0.001   | 4.75      | 0.106    | 7.6                                      | 0.001    | 5.16       | 0.001    |
| Hips (cm)                | 8.57                                                        | <0.001   | 7.09      | 0.006    | 6.11                                     | 0.009    | 8.92       | <0.001   |
| Systolic BP (mmHG)       | 5.18                                                        | 0.002    | 0.78      | 0.981    | -3.5                                     | 0.349    | 6.74       | <0.001   |
| Diastolic BP (mm HG)     | 3.1                                                         | 0.018    | 3.03      | 0.048    | -2.64                                    | 0.337    | 5.26       | <0.001   |
| Total Chol (mmol/l)      | 0.09                                                        | 0.294    | -0.08     | 0.539    | 0.12                                     | 0.018    | -0.06      | 0.491    |
| Fasting glucose (mmol/l) | -0.02                                                       | 0.729    | -0.04     | 0.818    | -0.13                                    | 0.462    | 0          | 0.927    |
| HbA1c                    | -0.07                                                       | 0.388    | -0.11     | 0.494    | -0.24                                    | 0.138    | -0.03      | 0.763    |
| HDL-Chol (mmol/l)        | 0.27                                                        | <0.001   | 0.13      | 0.069    | 0.29                                     | <0.001   | 0.21       | <0.001   |
| Triglycerides (mmol/l)   | 0.75                                                        | <0.001   | 0.67      | <0.001   | 0.57                                     | 0.001    | 0.75       | <0.001   |
| 25(OH)D (nmol/l)         | 7.2                                                         | <0.001   | 10.1      | 0.004    | 10.05                                    | <0.001   | 7.47       | <0.001   |
| <b>Adults</b>            |                                                             |          |           |          |                                          |          |            |          |
| Weight (Kg)              | 2.46                                                        | 0.023    | 0.96      | 0.251    | 1.7                                      | 0.022    | 1.22       | 0.337    |
| BMI (Kg/m <sup>2</sup> ) | 0.97                                                        | 0.017    | 0.4       | 0.216    | 0.66                                     | 0.021    | 0.51       | 0.281    |
| Waist (cm)               | -3.17                                                       | 0.076    | -3.94     | 0.002    | -3.57                                    | 0.003    | -3.78      | 0.049    |
| Hips (cm)                | -4.81                                                       | 0.013    | -8.28     | <0.001   | -7.42                                    | <0.001   | -6.18      | 0.004    |
| Systolic BP (mmHG)       | -9.76                                                       | <0.001   | -8.03     | <0.001   | -7.53                                    | <0.001   | -10.67     | <0.001   |
| Diastolic BP (mm HG)     | -2.64                                                       | 0.085    | -2.76     | 0.031    | -3.4                                     | 0.007    | -1.53      | 0.325    |
| Total Chol (mmol/l)      | 0.33                                                        | 0.016    | 0.28      | 0.003    | 0.36                                     | <0.001   | 0.22       | 0.097    |
| Fasting glucose (mmol/l) | -0.13                                                       | 0.543    | -0.07     | 0.727    | -0.21                                    | 0.254    | 0.12       | 0.616    |

|                        |       |        |       |        |       |        |      |        |
|------------------------|-------|--------|-------|--------|-------|--------|------|--------|
| HbA1c                  | 0.2   | 0.113  | 0.36  | 0.002  | 0.35  | 0.002  | 0.21 | 0.098  |
| HDL-Chol (mmol/l)      | 0.38  | <0.001 | 0.42  | <0.001 | 0.45  | <0.001 | 0.35 | <0.001 |
| Triglycerides (mmol/l) | -0.1  | 0.609  | -0.01 | 0.479  | -0.11 | 0.009  | 0.14 | 0.098  |
| 25(OH)D D(nmol/l)      | -4.27 | 0.597  | 12.48 | 0.056  | 6.75  | 0.271  | 0.35 | 0.114  |

**Note:** The data are presented as mean and median differences (post-vaccination – pre-vaccination) in the groups for continuous normal and continuous non-normal variables, along with the associated p-values. P<.05 was considered statistically significant.

**Table S2:** Pre- to post-vaccination changes in the prevalence of MetS and its components by study groups and the associated p-values.

| Mets components    | Pre- Vac-<br>cination | Post- Vac-<br>cination | 1 <sup>st</sup> to 2 <sup>nd</sup> dose (weeks) |          |           |          | Time to final dose (months) |          |            |          |
|--------------------|-----------------------|------------------------|-------------------------------------------------|----------|-----------|----------|-----------------------------|----------|------------|----------|
|                    |                       |                        | ≤ 8 weeks                                       | <i>p</i> | > 8 weeks | <i>p</i> | ≤ 6 months                  | <i>p</i> | > 6 months | <i>p</i> |
| Adolescents        |                       |                        |                                                 |          |           |          |                             |          |            |          |
| Central Obesity    | 7 (5.3)               | 24 (18.2)              | 13.6                                            | 0.002    | 10.9      | 0.219    | 13.8                        | 0.125    | 12.5       | 0.004    |
| Hyperglycemia      | 12 (9.1)              | 17 (12.9)              | 0                                               | 1        | 13.5      | 0.125    | 0                           | 1        | 5.2        | 0.302    |
| Low HDL            | 82 (62.1)             | 53 (40.2)              | -25.3                                           | 0.001    | -13.6     | 0.332    | -20.6                       | 0.003    | -14.5      | 0.054    |
| High Triglycerides | 26 (19.7)             | 85 (64.4)              | 47.4                                            | <0.001   | 37.9      | 0.001    | 30.6                        | 0.007    | 50         | <0.001   |
| Hypertension       | 30 (22.7)             | 28 (21.2)              | -5.3                                            | 0.383    | 8.1       | 0.549    | -16.7                       | 0.109    | 4.2        | 0.523    |
| Mets               | 11 (8.3)              | 22 (16.7)              | 4.2                                             | 0.481    | 18.9      | 0.039    | 0                           | 1        | 11.4       | 0.013    |
| MetS comp.         | 1.19 ± 1.0            | 1.57 ± 1.0             | 0.31                                            | 0.032    | 0.57      | 0.014    | -0.14                       | 0.436    | 0.58       | <0.001   |
| Adults             |                       |                        |                                                 |          |           |          |                             |          |            |          |
| Central Obesity    | 46 (24.7)             | 39 (21.0)              | 1.4                                             | 0.991    | -6.9      | 0.134    | -5.9                        | 0.143    | 0          | 1        |
| Hyperglycemia      | 47 (25.3)             | 35 (18.8)              | -7.2                                            | 0.227    | -6        | 0.296    | -10.2                       | 0.036    | 0          | 1        |
| Low HDL            | 147 (79.0)            | 55 (29.6)              | -47.1                                           | <0.001   | -50.8     | <0.001   | -55.1                       | <0.001   | -39.7      | <0.001   |
| High Triglycerides | 48 (25.8)             | 41 (22.0)              | -4.3                                            | 0.629    | -3.5      | 0.636    | -11.9                       | 0.002    | 10.3       | 0.621    |
| Hypertension       | 54 (29.0)             | 14 (7.5)               | -21.4                                           | 0.003    | -21.5     | <0.001   | -22.9                       | <0.001   | -19.2      | 0.007    |
| MetS               | 48 (25.8)             | 21 (11.3)              | -12.8                                           | 0.022    | -15.5     | 0.005    | -16.1                       | 0.001    | -11.8      | 0.115    |
| MetS comp.         | 1.84 ± 1.2            | 0.99 ± 1.1             | -0.79                                           | <0.001   | -0.89     | <0.001   | -1.06                       | <0.001   | -0.49      | 0.017    |

Note: The prevalence of MetS and its components is presented by N (%). The pre-and post-vaccination changes are presented by the prevalence percentage from pre-vaccination to post-vaccination visits, calculated for all four study groups.  $P < 0.05$  was considered statistically significant.

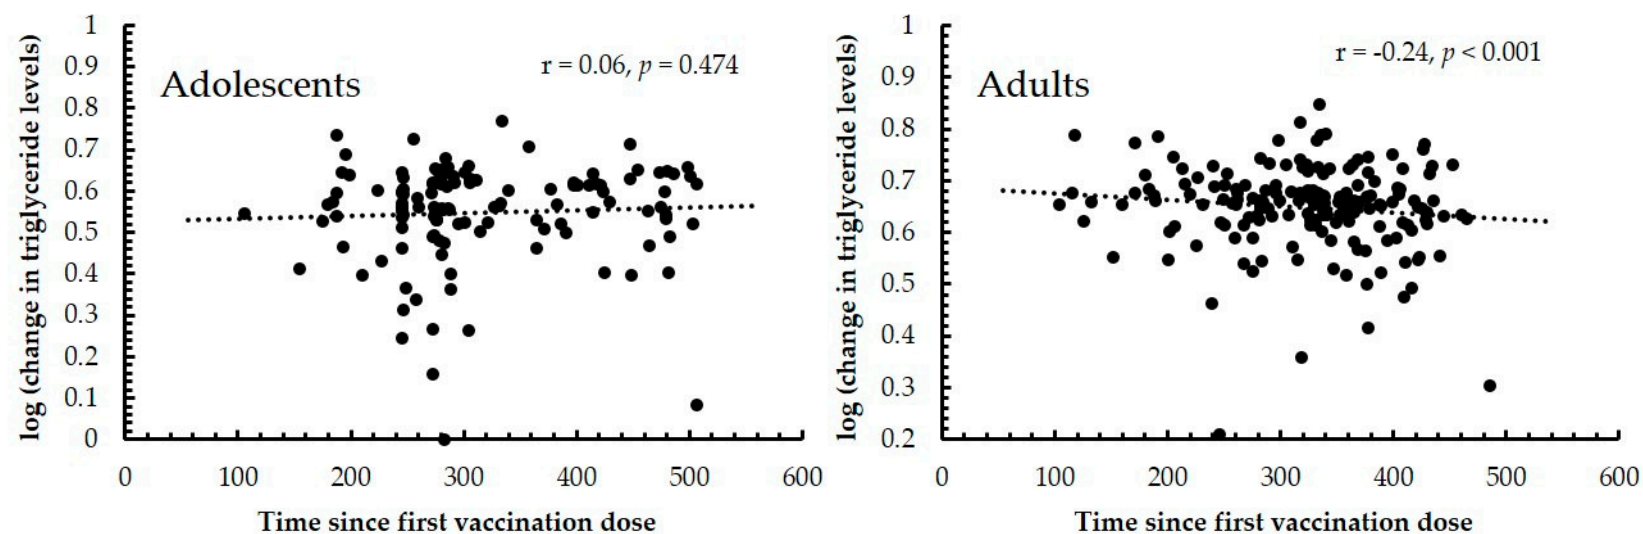

**Figure S1.** Scatterplot depicting the correlation between time since first dose and pre to post vaccination changes in triglyceride levels.
